# Supplementary material
Source: Springer Nature journal article supplement (https://www.springermedizin.de/resource/supplementary/12889_2012_4747_MOESM2_ESM.pdf/9490458)
Supplement: MOESM2 [file 9490458]

# POSE program

online questionnaire

biometric  
measurements

functional capacity  
evaluation

counselling session

No/low risk → general  
health principles

Medium risk →  
mono-disciplinary  
intervention

High risk → multi-  
disciplinary  
intervention
